# Supplementary material
Source: HighWire-hosted journal article supplement (https://www.cmajopen.ca/highwire/filestream/87342/field_highwire_adjunct_files/1/open-2021-0085-2-at.pdf)
Supplement: open-2021-0085-2-at.pdf [file open-2021-0085-2-at.pdf]

**Table S2. Diagnostic estimates for most common symptoms, both sites combined**

| <b>Symptoms</b>                  | <b>Label</b> | <b>Estimate</b> | <b>Lower</b> | <b>Upper</b> |
|----------------------------------|--------------|-----------------|--------------|--------------|
| Anosmia                          | Sensitivity  | 0.138           | 0.121        | 0.154        |
| Anosmia                          | Specificity  | 0.980           | 0.979        | 0.981        |
| Anosmia                          | PPV          | 0.120           | 0.106        | 0.135        |
| Anosmia                          | NPV          | 0.983           | 0.982        | 0.984        |
| Anosmia                          | Accuracy     | 0.963           | 0.962        | 0.965        |
| Anosmia                          | LR+          | 6.828           | 5.939        | 7.716        |
| Anosmia                          | LR-          | 0.880           | 0.863        | 0.897        |
| Cough and/or shortness of breath | Sensitivity  | 0.344           | 0.321        | 0.367        |
| Cough and/or shortness of breath | Specificity  | 0.872           | 0.870        | 0.874        |
| Cough and/or shortness of breath | PPV          | 0.051           | 0.047        | 0.055        |
| Cough and/or shortness of breath | NPV          | 0.985           | 0.984        | 0.986        |
| Cough and/or shortness of breath | Accuracy     | 0.862           | 0.859        | 0.864        |
| Cough and/or shortness of breath | LR+          | 2.686           | 2.500        | 2.872        |
| Cough and/or shortness of breath | LR-          | 0.752           | 0.726        | 0.779        |
| Diarrhea and/or abdominal pain   | Sensitivity  | 0.101           | 0.087        | 0.116        |
| Diarrhea and/or abdominal pain   | Specificity  | 0.932           | 0.930        | 0.934        |
| Diarrhea and/or abdominal pain   | PPV          | 0.029           | 0.025        | 0.033        |
| Diarrhea and/or abdominal pain   | NPV          | 0.981           | 0.980        | 0.982        |
| Diarrhea and/or abdominal pain   | Accuracy     | 0.915           | 0.914        | 0.917        |
| Diarrhea and/or abdominal pain   | LR+          | 1.484           | 1.267        | 1.702        |
| Diarrhea and/or abdominal pain   | LR-          | 0.965           | 0.949        | 0.980        |
| Fever                            | Sensitivity  | 0.249           | 0.228        | 0.270        |
| Fever                            | Specificity  | 0.934           | 0.932        | 0.935        |
| Fever                            | PPV          | 0.070           | 0.063        | 0.076        |
| Fever                            | NPV          | 0.984           | 0.983        | 0.985        |
| Fever                            | Accuracy     | 0.920           | 0.918        | 0.922        |
| Fever                            | LR+          | 3.746           | 3.416        | 4.075        |
| Fever                            | LR-          | 0.805           | 0.782        | 0.827        |
